# Supplementary material for: Highly efficient synthesis of novel bio-based pentamethylene dicarbamate via carbonylation of pentanediamine with ethyl carbamate over well-defined titanium oxide catalysts
Source: Royal Society of Chemistry journal article supplement (doi:10.1039/d2cy00073c), 2022-01-01
Supplement: d2cy00073c1.pdf [file d2cy00073c1.pdf]

Highly efficient synthesis of novel bio-based pentamethylene  
dicarbamate via carbonylation of pentanediamine with ethyl carbamate  
over well-defined titanium oxide catalyst

Xiang Hui <sup>a,b,c</sup>, Ligu Wang <sup>a,b,c,e\*</sup>, Yan Cao <sup>a</sup>, Shuang Xu <sup>a</sup>, Peng He <sup>a</sup>, Huiquan Li <sup>a,b,c,d</sup>

<sup>a</sup> Key Laboratory of Green Process and Engineering, National Engineering Research Center of Green Recycling for Strategic Metal Resources, Institute of Process Engineering, Chinese Academy of Sciences, Beijing, 100190, China.

<sup>b</sup> Sino-Danish College, University of Chinese Academy of Sciences, Beijing, 100049, China

<sup>c</sup> Sino-Danish Center for Education and Research, University of Chinese Academy of Sciences, Beijing, 100049, China

<sup>d</sup> School of Chemical Engineering, University of Chinese Academy of Sciences, Beijing, 100049, China

<sup>e</sup> Dalian National Laboratory for Clean Energy, Dalian, 116023, China

Corresponding Authors: lgwang@ipe.ac.cn

**Table S1.** Texture properties of TiO<sub>2</sub>-101 and TiO<sub>2</sub>-110

| Entry | Catalysts             | S <sup>BET</sup> /(m <sup>2</sup> g <sup>-1</sup> ) | Pore diameter /(nm) | Pore volume (cm <sup>3</sup> g <sup>-1</sup> ) |
|-------|-----------------------|-----------------------------------------------------|---------------------|------------------------------------------------|
| 1     | TiO <sub>2</sub> -101 | 6.76                                                | 25.60               | 0.039                                          |
| 2     | TiO <sub>2</sub> -110 | 70.91                                               | 10.80               | 0.25                                           |

**Table S2.** The amounts of acidic sites of catalysts

| Catalyst              | Peak position (°C) | Quantity (μmol g <sup>-1</sup> ) | Peak position (°C) | Quantity (μmol g <sup>-1</sup> ) | Total acidity (μmol g <sup>-1</sup> ) |
|-----------------------|--------------------|----------------------------------|--------------------|----------------------------------|---------------------------------------|
| TiO <sub>2</sub> -101 | 167                | 103.6                            | 296                | 276.6                            | 370                                   |
| TiO <sub>2</sub> -110 | 167                | 50.6                             | 333                | 34.7                             | 85                                    |

**Table S3.** Performance of different catalysts for the syntheses of carbamates

| Entry | Catalysts                         | Product | Conversion of amines (%) | Selectivity of amines (%) | TOF (g·g <sup>-1</sup> h <sup>-1</sup> ) <sup>a</sup> | Reference |
|-------|-----------------------------------|---------|--------------------------|---------------------------|-------------------------------------------------------|-----------|
| 1     | PbO                               | MDC     | 100                      | 83                        | 6.86                                                  | 8         |
| 2     | PbO <sub>2</sub>                  | HDC     | 100                      | 93                        | 3.27                                                  | 10        |
| 3     | Ni/Fe <sub>3</sub> O <sub>4</sub> | HDC     | 100                      | 98                        | 4.82                                                  | 13        |
| 4     | TiO <sub>2</sub>                  | PDC     | 100                      | >99                       | 5.60                                                  | This work |

<sup>a</sup> TOF: g of carbamates per g of catalyst per hour

**Table S4.** The catalytic performances of various catalysts for the synthesis of PDC

| Catalyst         | Conversion of PDA/ % | Yield of PDC/% |
|------------------|----------------------|----------------|
| ZSM-5            | 100                  | 64             |
| HY               | 100                  | 84             |
| TiO <sub>2</sub> | 100                  | 90             |

Reaction conditions: molar ratio of ethanol, EC to PDA= 25:4:1, reaction temperature = 190 °C, reaction time = 2 h.

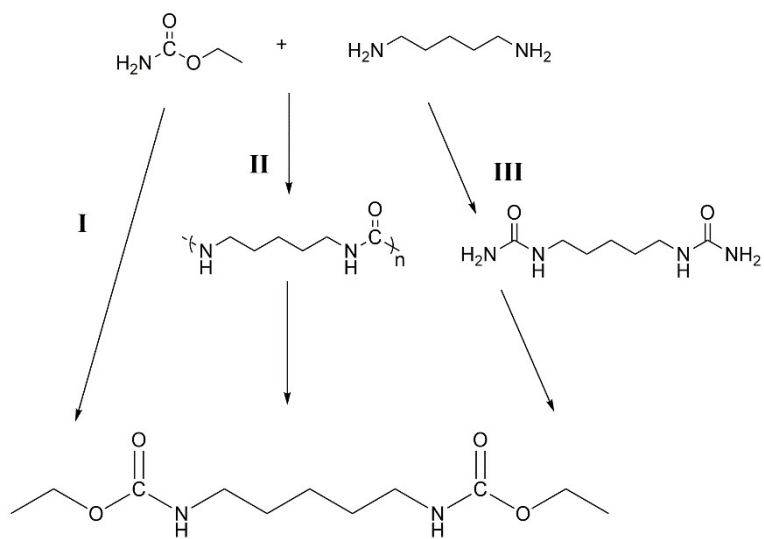

Scheme S1. Possible pathways for the synthesis of PDC from PDA and EC

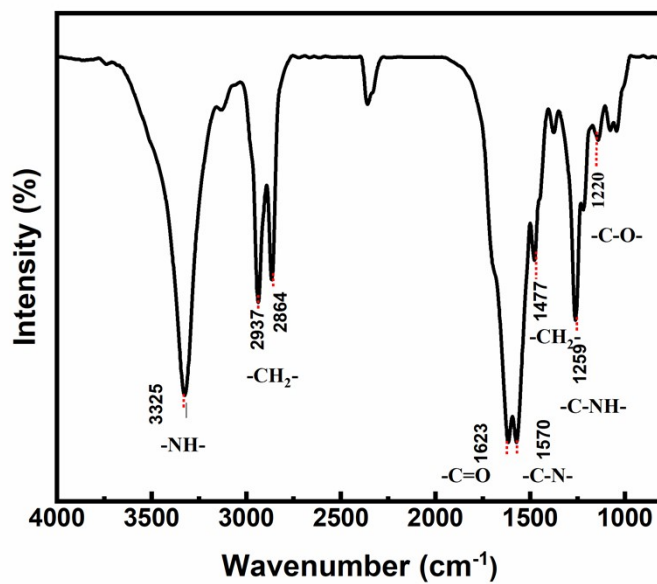

Fig. S1 The FT-IR spectrum of solid product

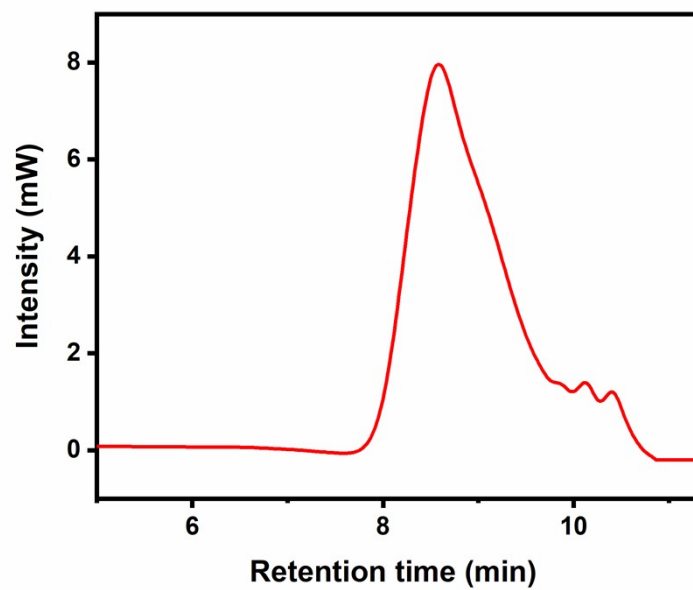

Fig. S2 GPC curve of intermediate

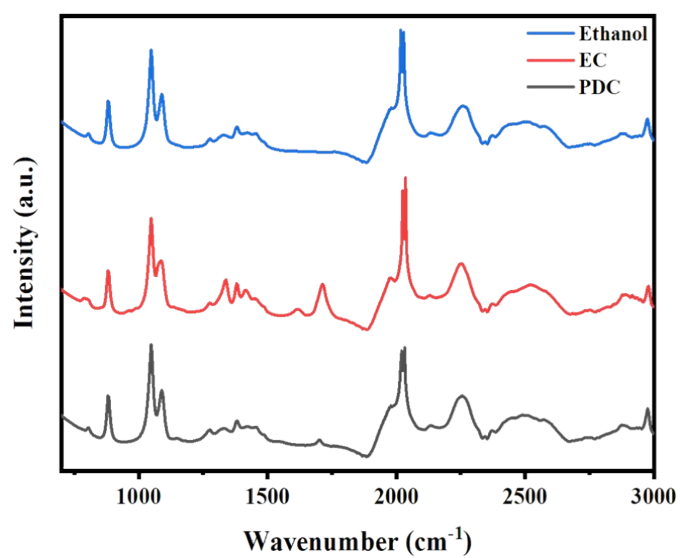

Fig. S3 FTIR spectra of ethanol, EC, and PDC

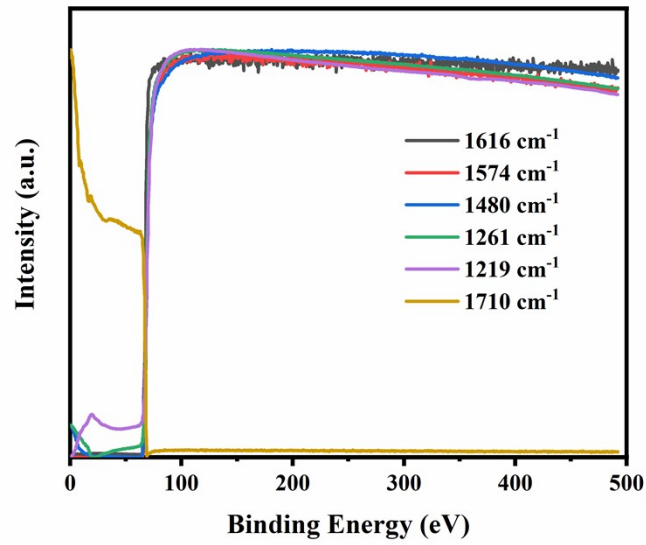

Fig. S4 Trends of formation for polyurea and PDC without catalyst in a real time concluded from FTIR spectra

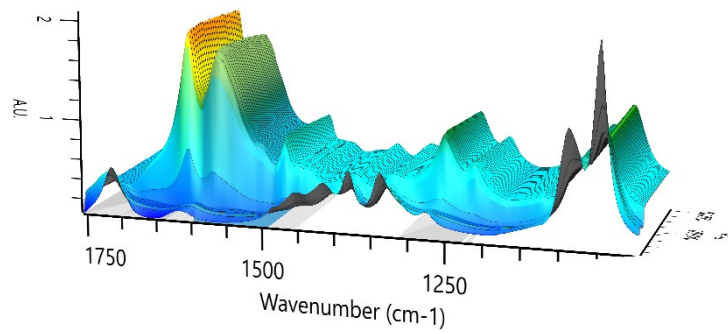

Fig. S5 The FTIR spectrum of polyurea and three-dimensional surface monitoring of the formation of polyurea without catalyst

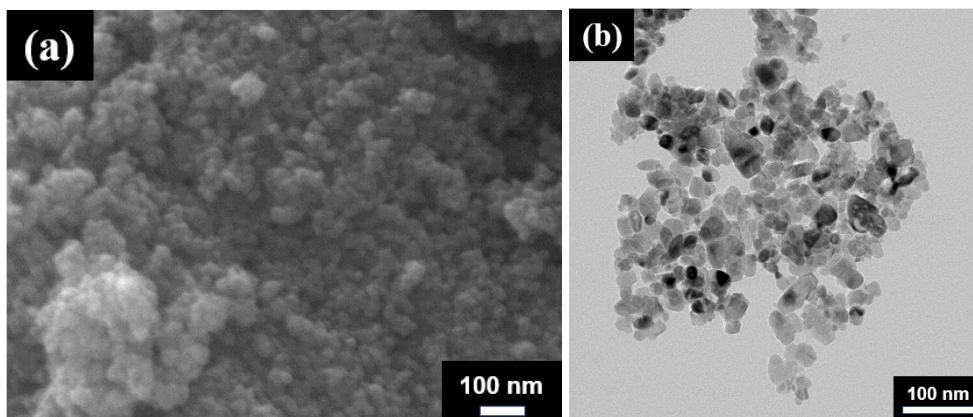

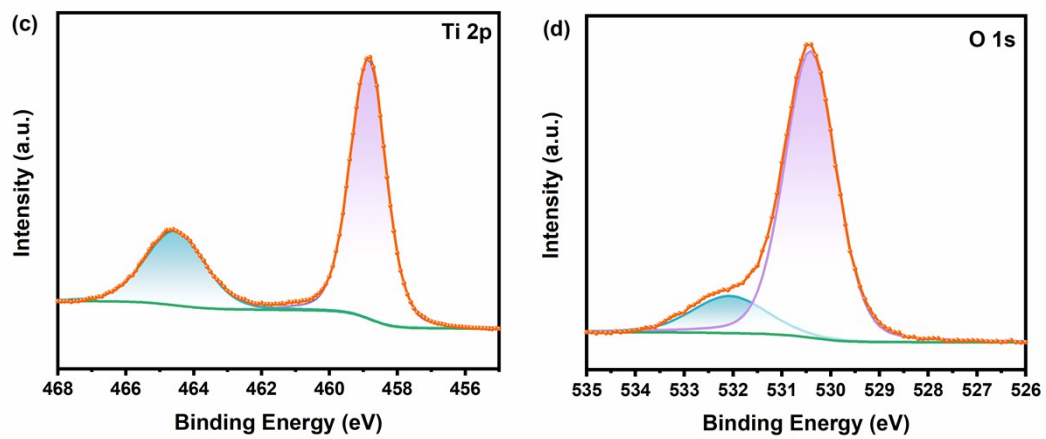

Figure S6. SEM (a) and TEM (b) images. XPS spectra of Ti 2p (c) and O 1p (d) for recycled catalyst
